# Supplementary material
Source: Springer Nature journal article supplement (https://www.springermedizin.de/resource/supplementary/12885_2008_1277_MOESM6_ESM.pdf/9471622)
Supplement: MOESM6 [file 9471622]

Additional file 6

File format: DOC

Title: Coefficients of the 14 genes in the principle component

Description:

| Gene    | ai   |
|---------|------|
| DC13    | 0.22 |
| DIAPH3  | 0.23 |
| CCNB1   | 0.23 |
| RFC4    | 0.25 |
| PRR11   | 0.26 |
| UBE2S   | 0.27 |
| TK1     | 0.27 |
| BUB1    | 0.27 |
| ORC6L   | 0.28 |
| CENPA   | 0.29 |
| MELK    | 0.29 |
| MYBL2   | 0.29 |
| PKMYT1  | 0.29 |
| RACGAP1 | 0.29 |

ai = loadings on the first principal component

Correlation of MS calculated by using regression coefficient versus sum of 14  $\Delta\Delta Ct$

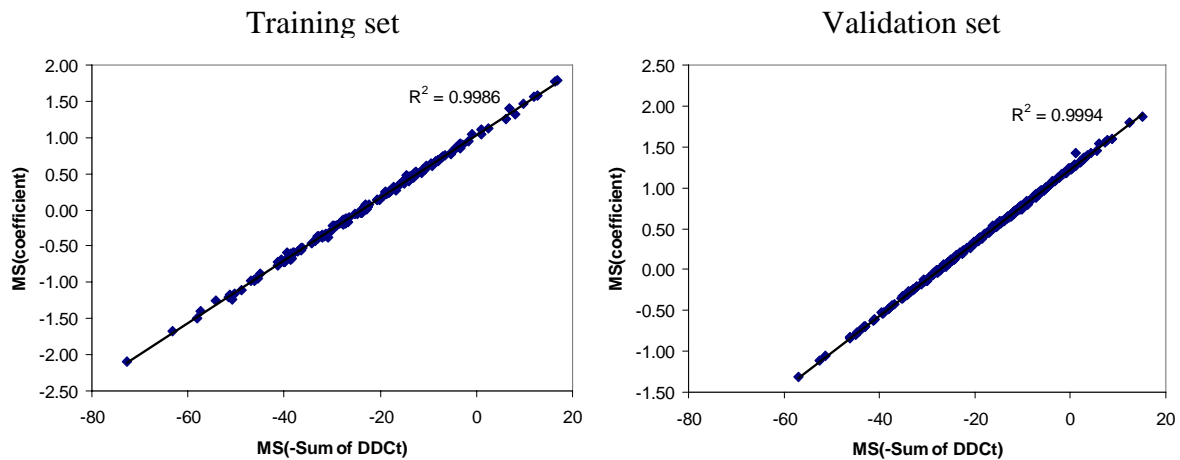

Near perfect correlations,  $R^2 = 0.9986$  and  $0.9994$ , were observed for the MS calculated by applying regression coefficient versus the sum of the 14  $\Delta\Delta Ct$  measurements for each subject in the training and validation set, respectively.
